# Supplementary material for: AMPK-Mediated Phosphorylation of Nrf2 at S374/S408/S433 Favors Its βTrCP2-Mediated Degradation in KEAP1-Deficient Cells
Source: MDPI journal article supplement (doi:10.3390/antiox12081586), 2023-08-09
Supplement: s1 [file s1]

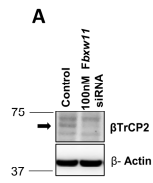

**Figure S1. Validation of the *Fbxw11* knock down in *Keap1*<sup>-/-</sup> cells.** A. *Keap1*<sup>-/-</sup> MEFs were transfected with 100 nM control or *Fbxw11*-specific siRNA for 48 h. Cell lysates were subjected to immunoblot analysis for endogenous βTrCP2 or β-Actin. A representative blot (A) is depicted. The arrow indicates the band of endogenous βTrCP2.
